# Supplementary material
Source: PubMed Central journal article supplement (PMC5247504)
Supplement: rspb20162429supp3.pdf [file rspb20162429supp3.pdf]

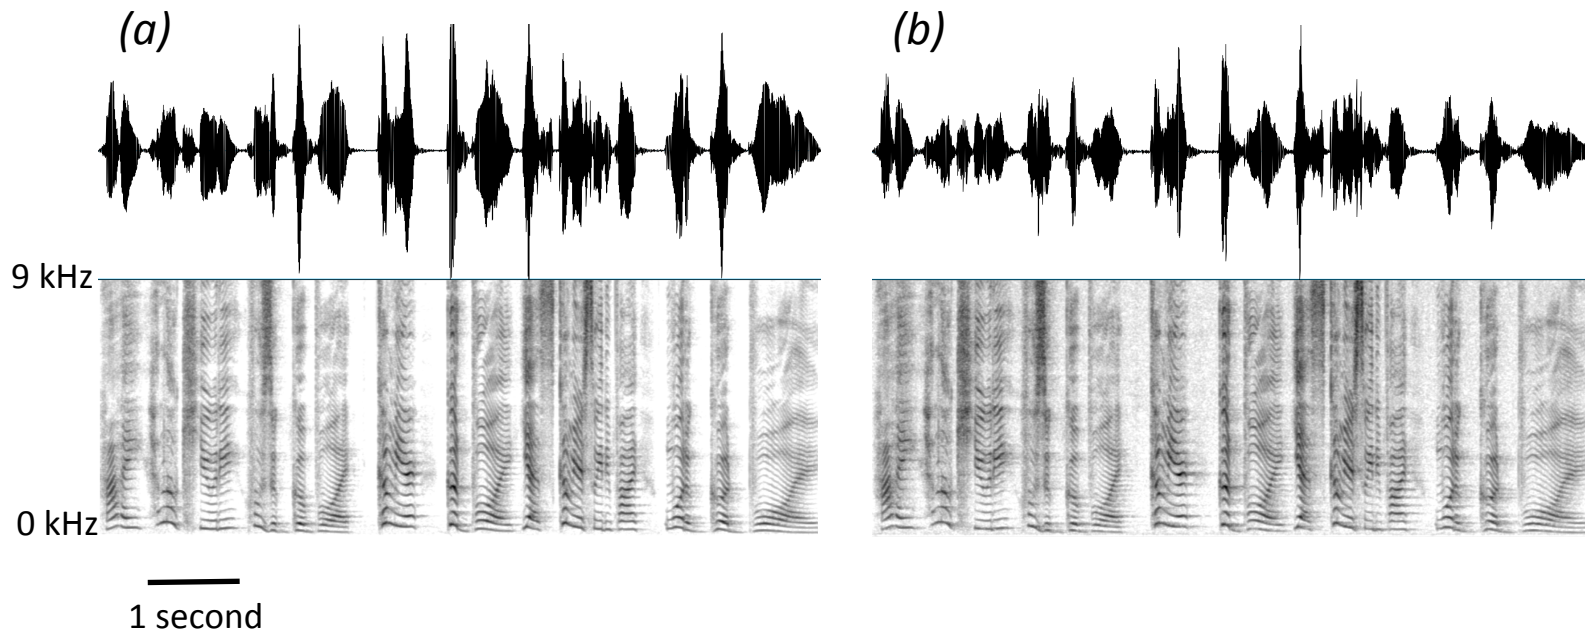

**Supplementary Figure 1. Narrowband waveforms and spectrograms of the original vocal sequence (a) and of the corresponding playback signal (b).** The played back signal was re-recorded at one meter from the Bose SoundLink Mini Bluetooth speaker II, in the room where dogs were tested. The spectrograms of both sounds are remarkably similar, with no noticeable filtering by the loudspeaker.
