# Supplementary material
Source: PubMed Central journal article supplement (PMC5247504)
Supplement: rspb20162429supp4.pdf [file rspb20162429supp4.pdf]

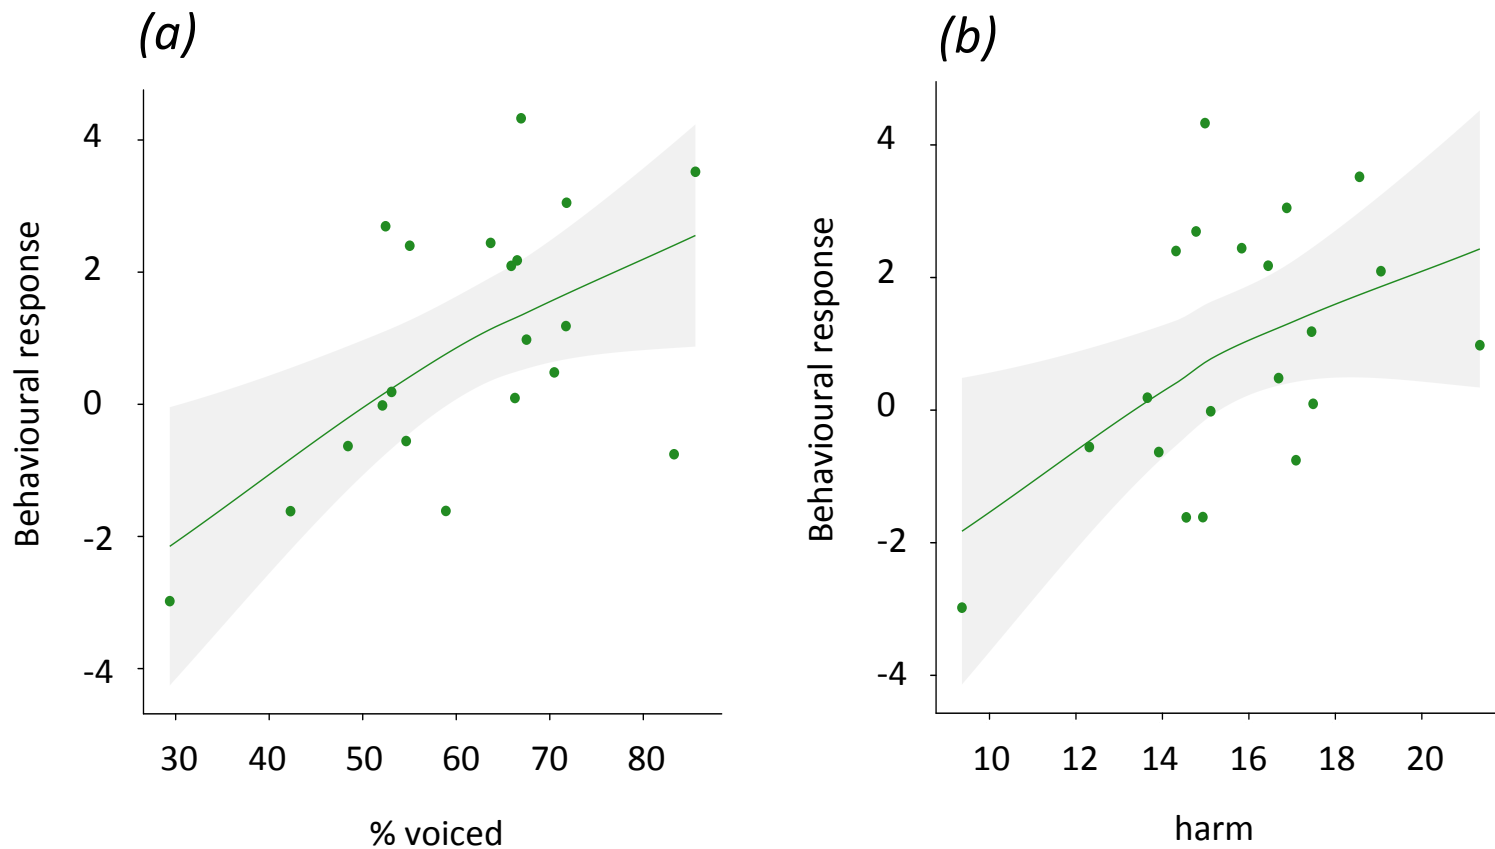

**Supplementary Figure 2. Influence of (a) the percentage of the signal that is characterized by a detectable pitch (%voiced) and (b) the speech harmonicity (harm) on puppies' behavioural reaction to playback.** The puppies' reaction is represented as a Principal Component score PC1 (higher values mean stronger reaction to the playback signal). Solid lines = loess regression curves (degree of smoothing = 2; degree of polynomial = 1); grey shaded areas = confidence intervals.
